# Supplementary material for: Interferon Alpha Induces Sustained Changes in NK Cell Responsiveness to Hepatitis B Viral Load Suppression In Vivo
Source: PubMed Central journal article supplement (PMC4972354; doi:10.1371/journal.ppat.1005788), 2016-08-03

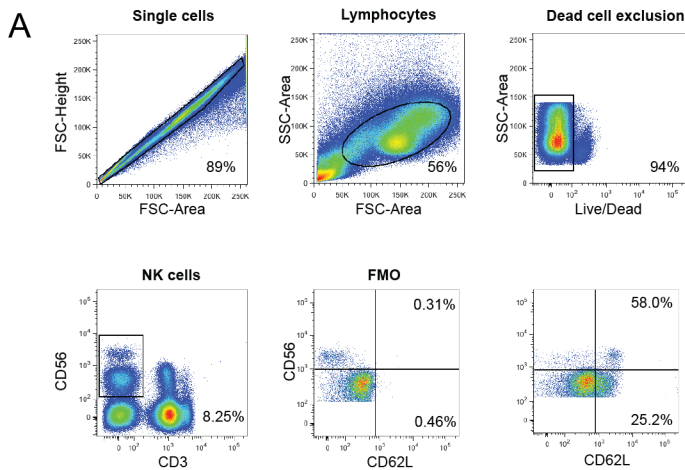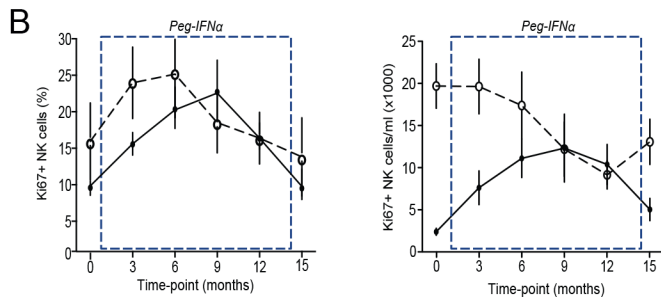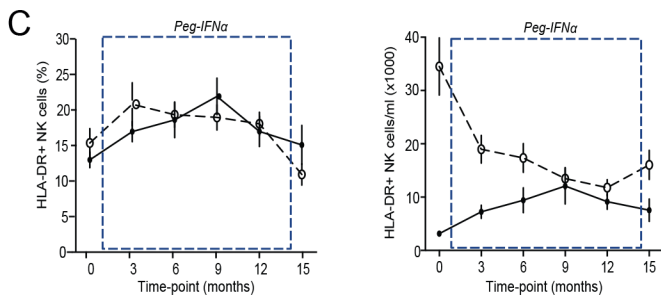

● CD56<sup>bright</sup> NK cells  
○ CD56<sup>dim</sup> NK cells

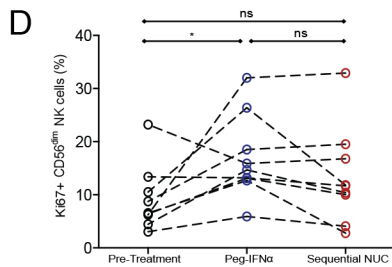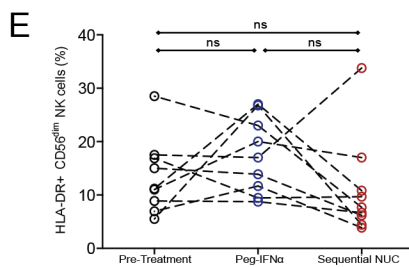

Supplement: ppat.1005788.s001.pdf [file ppat.1005788.s001.pdf]
