# Supplementary material for: Interferon Alpha Induces Sustained Changes in NK Cell Responsiveness to Hepatitis B Viral Load Suppression In Vivo
Source: PubMed Central journal article supplement (PMC4972354; doi:10.1371/journal.ppat.1005788), 2016-08-03
Supplement: ppat.1005788.s004.pdf [file ppat.1005788.s004.pdf]

**A**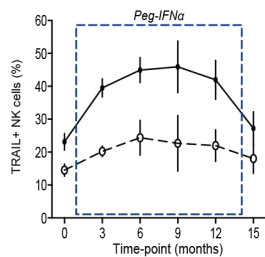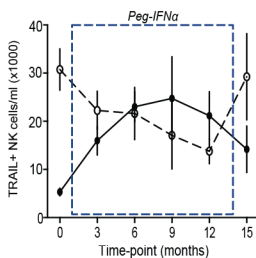**D**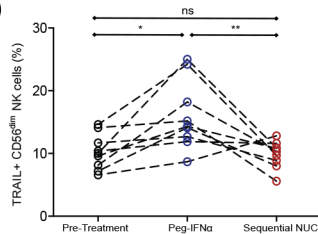**B**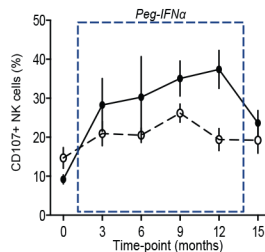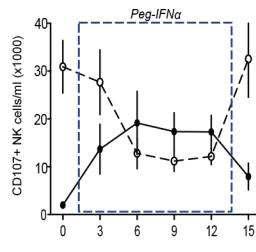**E**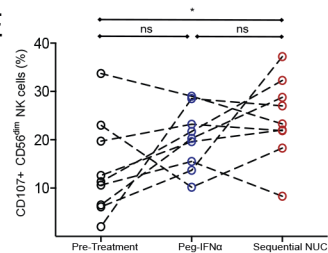**C**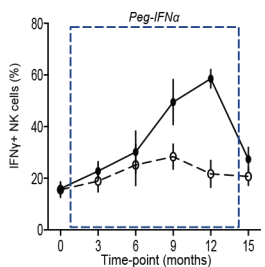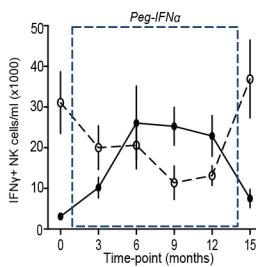**F**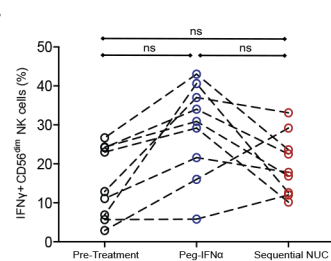

—●— CD56<sup>high</sup> NK cells  
 -○- CD56<sup>dim</sup> NK cells
