# Supplementary material for: Interferon Alpha Induces Sustained Changes in NK Cell Responsiveness to Hepatitis B Viral Load Suppression In Vivo
Source: PubMed Central journal article supplement (PMC4972354; doi:10.1371/journal.ppat.1005788), 2016-08-03
Supplement: ppat.1005788.s006.pdf [file ppat.1005788.s006.pdf]

A

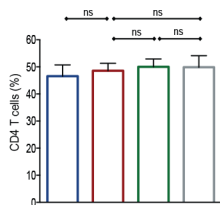

B

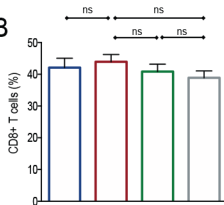

C

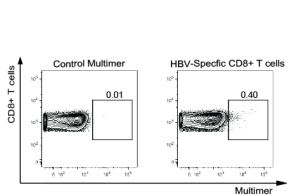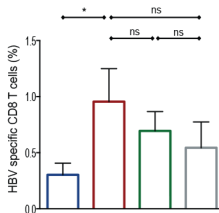

Peg-IFN $\alpha$  therapy (EoT)
  Sequential NUC
  de novo NUC
  9 months post Peg-IFN $\alpha$  (no further therapy)
