# Supplementary material for: Interferon Alpha Induces Sustained Changes in NK Cell Responsiveness to Hepatitis B Viral Load Suppression In Vivo
Source: PubMed Central journal article supplement (PMC4972354; doi:10.1371/journal.ppat.1005788), 2016-08-03
Supplement: ppat.1005788.s007.pdf [file ppat.1005788.s007.pdf]

**Table S1 - Clinical parameters of sequential NUC therapy patients (Cohort 1).**

|                    | <b>ALT*</b><br>(IU/L)<br><b>[138]</b> | <b>HBV DNA*</b><br>(log <sub>10</sub> IU/ml)<br><b>[7.64]</b> | <b>HBsAg*</b><br>(log <sub>10</sub> IU/ml)<br><b>[4.13]</b> | <b>ALT**</b><br>(IU/L)<br><b>[25]</b> | <b>HBV DNA**</b><br>(log <sub>10</sub> IU/ml)<br><b>[1.30]</b> | <b>HBsAg**</b><br>(log <sub>10</sub> IU/ml)<br><b>[3.20]</b> | <b>NUC</b><br><b>analogue</b> | <b>HBsAg</b><br><b>reduction</b><br><b>on NUC</b> | <b>HBeAg</b><br><b>seroconversion</b><br><b>on NUC</b> | <b>CMV</b><br><b>status</b> | <b>HLA-A2</b><br><b>status</b> |
|--------------------|---------------------------------------|---------------------------------------------------------------|-------------------------------------------------------------|---------------------------------------|----------------------------------------------------------------|--------------------------------------------------------------|-------------------------------|---------------------------------------------------|--------------------------------------------------------|-----------------------------|--------------------------------|
| Pt.2               | 153                                   | 8.53                                                          | 4.53                                                        | 36                                    | 1.30                                                           | 3.43                                                         | Entecavir                     | Yes                                               | No                                                     | Positive                    | Negative                       |
| Pt.3               | 118                                   | 7.71                                                          | 4.06                                                        | 40                                    | 1.30                                                           | 3.47                                                         | Tenofovir                     | Yes                                               | No                                                     | Positive                    | Negative                       |
| Pt.4               | 102                                   | 8.38                                                          | 4.48                                                        | 21                                    | 1.30                                                           | 2.57                                                         | Tenofovir                     | Yes                                               | Yes                                                    | Positive                    | Negative                       |
| Pt.6               | 202                                   | 8.42                                                          | 4.13                                                        | 19                                    | 1.30                                                           | 4.13                                                         | Entecavir                     | No                                                | No                                                     | Negative                    | Positive                       |
| Pt.8               | 81                                    | 6.98                                                          | 3.37                                                        | 15                                    | 1.30                                                           | 3.88                                                         | Tenofovir                     | No                                                | Yes                                                    | Positive                    | Positive                       |
| Pt.11              | 232                                   | 6.79                                                          | 4.36                                                        | 40                                    | 1.30                                                           | 3.73                                                         | Tenofovir                     | Yes                                               | Yes                                                    | Positive                    | Negative                       |
| Pt.13              | 204                                   | 3.37                                                          | 3.89                                                        | 20                                    | 1.30                                                           | 0                                                            | Entecavir                     | Yes <sup>^</sup>                                  | Yes                                                    | Positive                    | Positive                       |
| Pt.15              | 24                                    | 7.23                                                          | 3.03                                                        | 13                                    | 1.30                                                           | 3.38                                                         | Entecavir                     | No                                                | No                                                     | Positive                    | Negative                       |
| Pt.16              | 150                                   | 8.79                                                          | 4.02                                                        | 26                                    | 1.30                                                           | 3.25                                                         | Tenofovir                     | Yes                                               | No                                                     | Positive                    | Negative                       |
| Pt.19 <sup>§</sup> | 57                                    | 8.66                                                          | 5.07                                                        | 21                                    | 1.30                                                           | 3.27                                                         | Entecavir                     | Yes                                               | Yes                                                    | Positive                    | Positive                       |
| Pt.20 <sup>§</sup> | 138                                   | 8.17                                                          | 4.02                                                        | 21                                    | 1.30                                                           | 3.83                                                         | Tenofovir                     | Yes                                               | No                                                     | Positive                    | Negative                       |
| Pt.21 <sup>§</sup> | 152                                   | 8.68                                                          | 4.54                                                        | 18                                    | 1.30                                                           | 3.37                                                         | Tenofovir                     | Yes                                               | No                                                     | Positive                    | Positive                       |
| Pt.22 <sup>§</sup> | 99                                    | 8.17                                                          | 3.83                                                        | 27                                    | 1.30                                                           | 2.87                                                         | Tenofovir                     | Yes                                               | Yes                                                    | Positive                    | Negative                       |
| Pt.23 <sup>§</sup> | 232                                   | 7.05                                                          | 4.52                                                        | 33                                    | 1.30                                                           | 3.81                                                         | Tenofovir                     | Yes                                               | No                                                     | Positive                    | Negative                       |

Numbers in brackets under headings; ALT, HBV DNA & HBsAg = mean values

\* - denotes ALT, HBV DNA & HBsAg at time of sequential NUC initiation

\*\* - denotes ALT, HBV DNA & HBsAg at time of viral suppression

<sup>^</sup> - sustained HBsAg loss

<sup>§</sup> - sampled only at selected time-points on sequential NUC therapy
