# Supplementary material for: Interferon Alpha Induces Sustained Changes in NK Cell Responsiveness to Hepatitis B Viral Load Suppression In Vivo
Source: PubMed Central journal article supplement (PMC4972354; doi:10.1371/journal.ppat.1005788), 2016-08-03
Supplement: ppat.1005788.s008.pdf [file ppat.1005788.s008.pdf]

**Table S2 - Clinical parameters of de novo NUC therapy patients (Cohort 2).**

|       | Age<br>[32] | Sex | Genotype | ALT*<br>(IU/L)<br>[95] | HBV DNA*<br>(log <sub>10</sub> IU/ml)<br>[7.76] | HBsAg*<br>(log <sub>10</sub> IU/ml)<br>[4.17] | ALT**<br>(IU/L)<br>[26] | HBV DNA**<br>(log <sub>10</sub> IU/ml)<br>[1.30] | HBsAg**<br>(log <sub>10</sub> IU/ml)<br>[3.98] | Fibrosis<br>(Ishak) | NUC<br>analogue | HBeAg sero<br>conversion<br>on NUC | CMV<br>status | HLA-A2<br>status |
|-------|-------------|-----|----------|------------------------|-------------------------------------------------|-----------------------------------------------|-------------------------|--------------------------------------------------|------------------------------------------------|---------------------|-----------------|------------------------------------|---------------|------------------|
| Pt.24 | 40          | M   | ND       | 47                     | 7.95                                            | 4.34                                          | 27                      | 1.30                                             | 4.09                                           | 4                   | Tenofovir       | No                                 | Positive      | Positive         |
| Pt.25 | 29          | M   | ND       | 127                    | 7.41                                            | 3.94                                          | 25                      | 1.30                                             | 3.84                                           | ND                  | Tenofovir       | No                                 | Positive      | Positive         |
| Pt.26 | 46          | F   | E        | 53                     | 6.91                                            | 3.93                                          | 23                      | 1.30                                             | 3.03                                           | 1                   | Entecavir       | No                                 | Positive      | Negative         |
| Pt.27 | 57          | F   | ND       | 65                     | 6.90                                            | 3.37                                          | 10                      | 1.30                                             | 3.25                                           | 1                   | Entecavir       | No                                 | Positive      | Positive         |
| Pt.28 | 37          | M   | C        | 353                    | 8.99                                            | 4.20                                          | 32                      | 1.30                                             | 4.26                                           | 5                   | Tenofovir       | No                                 | Positive      | Negative         |
| Pt.29 | 23          | F   | B        | 54                     | 8.10                                            | 4.19                                          | 24                      | 1.30                                             | 4.07                                           | 3                   | Tenofovir       | No                                 | Positive      | Positive         |
| Pt.30 | 34          | F   | B        | 72                     | 7.98                                            | 4.39                                          | 37                      | 1.30                                             | 4.22                                           | 1                   | Tenofovir       | No                                 | Positive      | Positive         |
| Pt.31 | 42          | M   | E        | 58                     | 8.21                                            | 4.85                                          | 46                      | 1.30                                             | 4.53                                           | 3                   | Tenofovir       | No                                 | Positive      | Negative         |
| Pt.32 | 59          | F   | D        | 60                     | 8.02                                            | 4.39                                          | 32                      | 1.30                                             | 4.48                                           | 3                   | Entecavir       | No                                 | Positive      | Negative         |
| Pt.33 | 29          | M   | D        | 111                    | 7.80                                            | 4.06                                          | 12                      | 1.30                                             | 3.99                                           | ND                  | Entecavir       | No                                 | Positive      | Negative         |
| Pt.34 | 45          | F   | E        | 40                     | 7.82                                            | 4.45                                          | 15                      | 1.30                                             | 4.31                                           | 1                   | Tenofovir       | No                                 | Positive      | Positive         |
| Pt.35 | 42          | M   | E        | 95                     | 7.11                                            | 3.95                                          | 31                      | 1.30                                             | 3.74                                           | ND                  | Tenofovir       | No                                 | Positive      | Positive         |

Numbers in brackets under headings; age = median values; ALT, HBV DNA & HBsAg = mean values

\* - denotes ALT, HBV DNA & HBsAg at time of de novo NUC initiation

\*\* - denotes ALT, HBV DNA & HBsAg at time of viral suppression

ND – Test not done
