# Supplementary material for: Interferon Alpha Induces Sustained Changes in NK Cell Responsiveness to Hepatitis B Viral Load Suppression In Vivo
Source: PubMed Central journal article supplement (PMC4972354; doi:10.1371/journal.ppat.1005788), 2016-08-03
Supplement: ppat.1005788.s009.pdf [file ppat.1005788.s009.pdf]

**Table S3 - Clinical parameters of Peg-IFN $\alpha$  only therapy patients (Cohort 3).**

|       | Age<br>[31] | Sex | Genotype | ALT*<br>(IU/L)<br>[113] | HBV DNA*<br>(log <sub>10</sub> IU/ml)<br>[7.08] | HBsAg*<br>(log <sub>10</sub> IU/m)<br>[4.46] | ALT**<br>(IU/L)<br>[36] | HBV DNA**<br>(log <sub>10</sub> IU/ml)<br>[4.39] | HBsAg**<br>(log <sub>10</sub> IU/ml)<br>[4.07] | Fibrosis<br>(Ishak) | CMV<br>status | HLA-A2<br>status | Outcome        |
|-------|-------------|-----|----------|-------------------------|-------------------------------------------------|----------------------------------------------|-------------------------|--------------------------------------------------|------------------------------------------------|---------------------|---------------|------------------|----------------|
| Pt.36 | 48          | M   | B        | 62                      | 5.23                                            | 4.33                                         | 50                      | 5.23                                             | 4.15                                           | 1                   | Positive      | Positive         | Non-Responder† |
| Pt.37 | 25          | M   | D        | 72                      | 7.63                                            | 5.18                                         | 39                      | 9.27                                             | 5.60                                           | 1                   | Positive      | Positive         | Non-Responder† |
| Pt.38 | 31          | F   | D        | 63                      | 8.42                                            | 4.86                                         | 21                      | 5.38                                             | 4.79                                           | 3                   | Positive      | Negative         | Non-Responder† |
| Pt.39 | 34          | M   | A        | 51                      | 6.21                                            | 4.58                                         | 95                      | 6.20                                             | 4.11                                           | 1                   | Positive      | Negative         | Non-Responder† |
| Pt.40 | 27          | F   | A        | 181                     | 8.36                                            | 4.19                                         | 14                      | 2.65                                             | 3.69                                           | 2                   | Positive      | Positive         | Responder#     |
| Pt.41 | 30          | F   | C        | 381                     | 7.10                                            | 4.91                                         | 13                      | 3.12                                             | 3.68                                           | 1                   | Positive      | Positive         | Responder#     |
| Pt.42 | 31          | F   | B        | 85                      | 6.37                                            | 3.61                                         | 19                      | 1.30                                             | 3.56                                           | 1                   | Positive      | Negative         | Responder#     |
| Pt.43 | 31          | M   | C        | 65                      | 7.12                                            | 3.81                                         | 23                      | 2.20                                             | 3.15                                           | 4                   | Positive      | Positive         | Responder#     |
| Pt.44 | 33          | M   | A        | 86                      | 8.04                                            | 4.56                                         | 35                      | 3.63                                             | 3.96                                           | 2                   | Positive      | Negative         | Non-Responder† |
| Pt.45 | 43          | M   | A        | 79                      | 6.27                                            | 4.54                                         | 50                      | 4.89                                             | 3.96                                           | 2                   | Positive      | Negative         | Non-Responder† |

Numbers in brackets under headings; age=median values; ALT, HBV DNA & HBsAg mean values

\* - denotes ALT, HBV DNA & HBsAg at baseline; prior to Peg-IFN $\alpha$  initiation.

\*\* - denotes ALT, HBV DNA & HBsAg at sampling time point (12 months post cessation of Peg-IFN $\alpha$ )

# - Sustained HBeAg seroconversion & HBV DNA <2000 IU/ml 6-months post cessation of Peg-IFN $\alpha$

† - Refused sequential NUC therapy
